# Supplementary material
Source: PubMed Central journal article supplement (PMC6583022)
Supplement: jamaotolaryngolheadnecksurg-145-509-s001.pdf [file jamaotolaryngolheadnecksurg-145-509-s001.pdf]

## Supplementary Online Content

Lisan Q, Van Sloten T, Marques Vidal P, et al. Association of positive airway pressure prescription with mortality in patients with obesity and severe obstructive sleep apnea: the Sleep Heart Health Study. *JAMA Oncology*. Published online April 11, 2019. doi: 10.1001/jamaoto.2019.0281.

**eTable 1.** Multivariable hazards ratios and their 95% confidence intervals of the covariates included in the Cox regression analysis evaluating association between positive airway pressure and all-cause mortality

**eTable 2.** Description of the population after propensity score matching.

This supplementary material has been provided by the authors to give readers additional information about their work.

**eTable 1: multivariable hazards ratios and their 95% confidence intervals of the covariates included in the Cox regression analysis evaluating association between positive airway pressure and all-cause mortality.**

|                                        | <b>Adjusted hazard ratio</b> | <b>95% CI</b> | <b>p-value</b> |
|----------------------------------------|------------------------------|---------------|----------------|
| Positive airway pressure               | 0.38                         | 0.18 – 0.81   | 0.01           |
| Prevalent CVD                          | 2.18                         | 1.12 – 4.23   | 0.02           |
| Hypertension                           | 1.82                         | 0.93 – 3.55   | 0.07           |
| Diabetes                               | 2.38                         | 1.03 – 5.48   | 0.04           |
| BMI (per 1 kg/m <sup>2</sup> increase) | 0.98                         | 0.93 – 1.03   | 0.41           |
| Education                              |                              |               |                |
| <10 years                              | 1 (reference)                |               |                |
| 11-15 years                            | 0.33                         | 0.14 – 0.82   | 0.02           |
| 16-20 years                            | 0.44                         | 0.18 – 1.17   | 0.10           |
| >20 years                              | 1.07                         | 0.16 – 7.18   | 0.94           |
| Smoking status                         |                              |               |                |
| Never                                  | 1 (reference)                |               |                |
| Current                                | 2.15                         | 0.64 – 7.18   | 0.21           |
| Former                                 | 1.95                         | 1.02 – 3.73   | 0.04           |
| Alcohol (drinks per day)               |                              |               |                |
| 0                                      | 1 (reference)                |               |                |
| 1-3                                    | 1.91                         | 0.83 – 4.40   | 0.13           |
| >3                                     | 0.93                         | 0.45 – 1.93   | 0.85           |

*Abbreviations:* BMI: body mass index, CVD: cardiovascular disease, CI: confidence interval.

*Note:* Cox regression analysis was adjusted for the variables listed in the table.

**eTable 2: description of the population after propensity score matching.**

|                          | PAP         |             | p-value |
|--------------------------|-------------|-------------|---------|
|                          | No<br>N=204 | Yes<br>N=51 |         |
| Age (years)              | 64.4 ± 9.99 | 63.2 ± 9.14 | 0.53    |
| Male gender              | 160 (78.4%) | 35 (68.6%)  | 0.26    |
| BMI (kg/m <sup>2</sup> ) | 31.1 ± 5.15 | 32.1 ± 5.93 | 0.36    |
| Education                |             |             | 0.37    |
| <10 years                | 9 (4.4%)    | 5 (9.8%)    |         |
| 11-15 years              | 90 (44.1%)  | 27 (52.9%)  |         |
| 16-20 years              | 98 (48.0%)  | 14 (27.5%)  |         |
| >20 years                | 7 (3.4%)    | 5 (9.8%)    |         |
| Smoking status           |             |             | 0.92    |
| Never                    | 77 (37.8%)  | 19 (37.2%)  |         |
| Current                  | 10 (4.9%)   | 4 (7.8%)    |         |
| Former                   | 117 (57.4%) | 28 (54.9%)  |         |
| Driving                  | 196 (96.1%) | 48 (94.1%)  | 0.64    |
| Neck circumference (cm)  | 41.1 ± 4.22 | 41.1 ± 3.60 | 0.97    |
| AHI                      | 29.0 ± 17.9 | 31.4 ± 15.2 | 0.32    |
| RDI                      | 25.3 ± 16.3 | 27.7 ± 14.7 | 0.32    |
| Sleep time (minutes)     | 598 ± 101   | 596 ± 90.2  | 0.92    |
| Epworth sleepiness score | 11.2 ± 4.72 | 10.6 ± 4.92 | 0.51    |
| Hypertension             | 90 (44.1%)  | 24 (47.1%)  | 0.77    |
| Diabetes                 | 31 (15.2%)  | 8 (15.7%)   | 0.95    |
| Cholesterol (mg/dL)      | 208 ± 36.6  | 209 ± 36.3  | 0.85    |
| HDL (mg/dL)              | 46.0 ± 16.1 | 46.6 ± 14.6 | 0.84    |
| History of:              |             |             |         |
| Angina                   | 6 (2.9%)    | 5 (9.8%)    | 0.75    |
| Heart failure            | 2 (1.0%)    | 2 (3.9%)    | 0.34    |
| Myocardial infarction    | 18 (8.8%)   | 4 (7.8%)    | 0.56    |
| Pacemaker                | 6 (2.9%)    | 2 (3.9%)    | 0.73    |
| Stroke                   | 10 (4.9%)   | 4 (7.8%)    | 0.92    |

Abbreviations: PAP: positive airway pressure, BMI: body mass index, AHI: apnea-hypopnea index, RDI: respiratory disturbance index, cm: centimeters, mg: milligrams, dL: deciliter.
